# Supplementary material for: Plasma-assisted defect engineering of N-doped NiCo2O4for efficient oxygen reduction
Source: Royal Society of Chemistry journal article supplement (doi:10.1039/d1cp00525a), 2021-01-01
Supplement: d1cp00525a1.pdf [file d1cp00525a1.pdf]

## **Supplementary Information**

### **Plasma-assisted defect engineering of N-doped NiCo<sub>2</sub>O<sub>4</sub> for efficient oxygen reduction**

Jingxuan Zheng, Xiangfeng Peng, and Zhao Wang\*

**Table S1** The ratios of Ni<sup>2+</sup> / Ni<sup>3+</sup> , Co<sup>2+</sup> / Co<sup>3+</sup> and O<sub>(V/M-O)</sub> determined by XPS

|            | Ni <sup>2+</sup> / Ni <sup>3+</sup> | Co <sup>2+</sup> / Co <sup>3+</sup> | O <sub>(V/M-O)</sub> |
|------------|-------------------------------------|-------------------------------------|----------------------|
| NCO-CP-O   | 0.47                                | 1.53                                | 0.78                 |
| NCO-CP-Air | 0.42                                | 1.92                                | 0.82                 |

**Table S2** Specific surface area of the prepared NCO-C, NCO-CP-O, NCO-CP-Air, NCO-CP-Ar catalysts

|                                                    | NCO-C   | NCO-CP-O | NCO-CP-Air | NCO-CP-Ar |
|----------------------------------------------------|---------|----------|------------|-----------|
| S <sub>BET</sub> (m <sup>2</sup> g <sup>-1</sup> ) | 12. 499 | 14. 986  | 15. 958    | 21. 2486  |

**Table S3** The amount of nitrogen on samples determined by XPS

| Sample | NCO-CP-AH | NCO-CP-AB | NCO-CP-AC |
|--------|-----------|-----------|-----------|
| N %    | 2.02      | 7.45      | 10.10     |

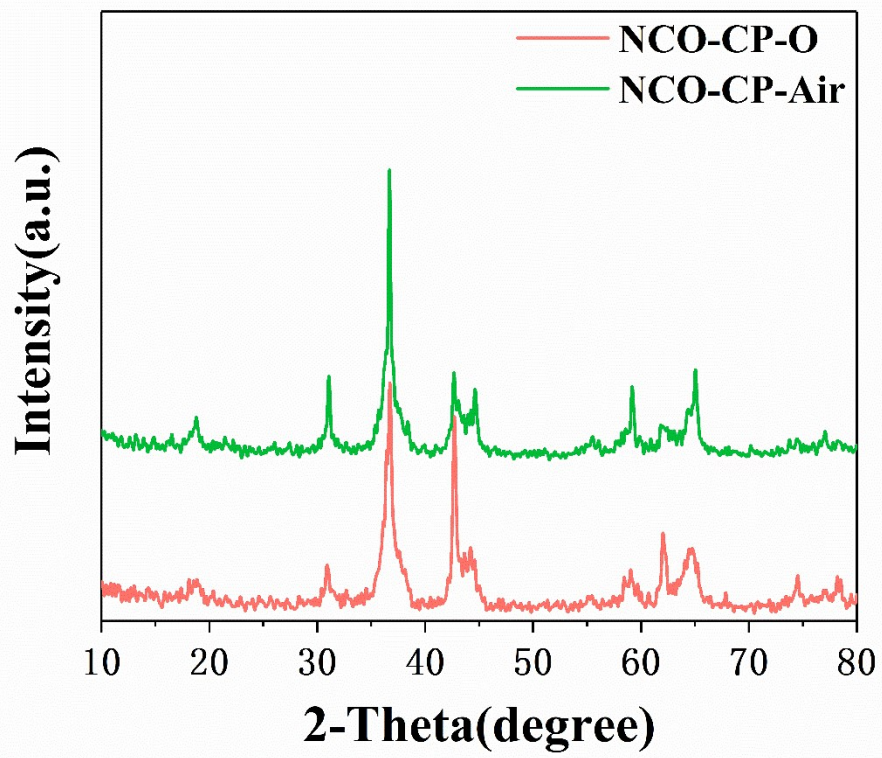

**Figure S1.** XRD pattern of NCO-CP-O and NCO-CP-Air

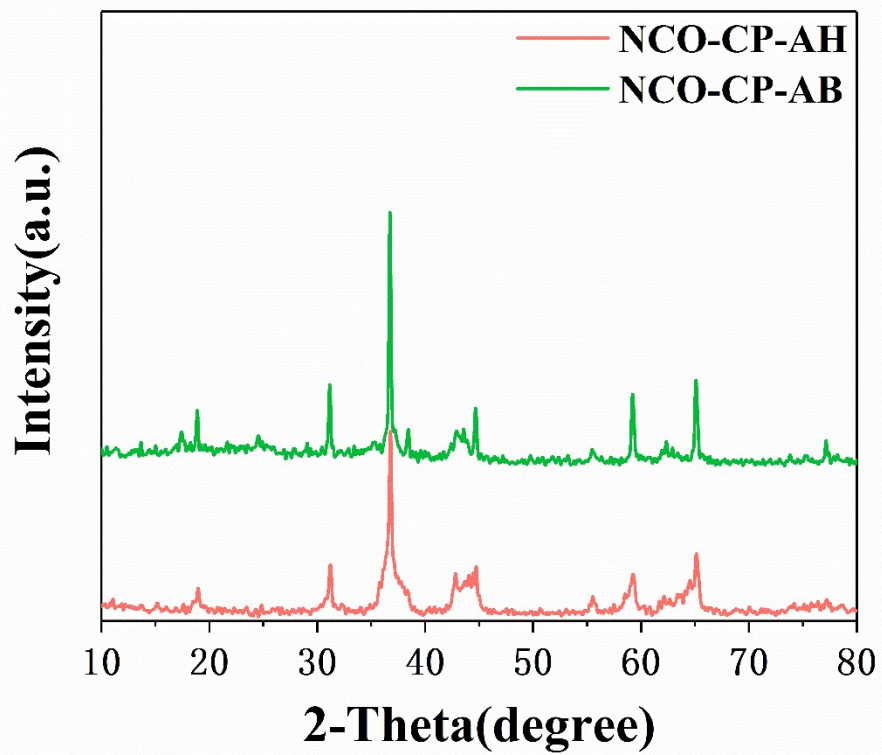

**Figure S2.** XRD pattern of NCO-CP-AH and NCO-CP-AB

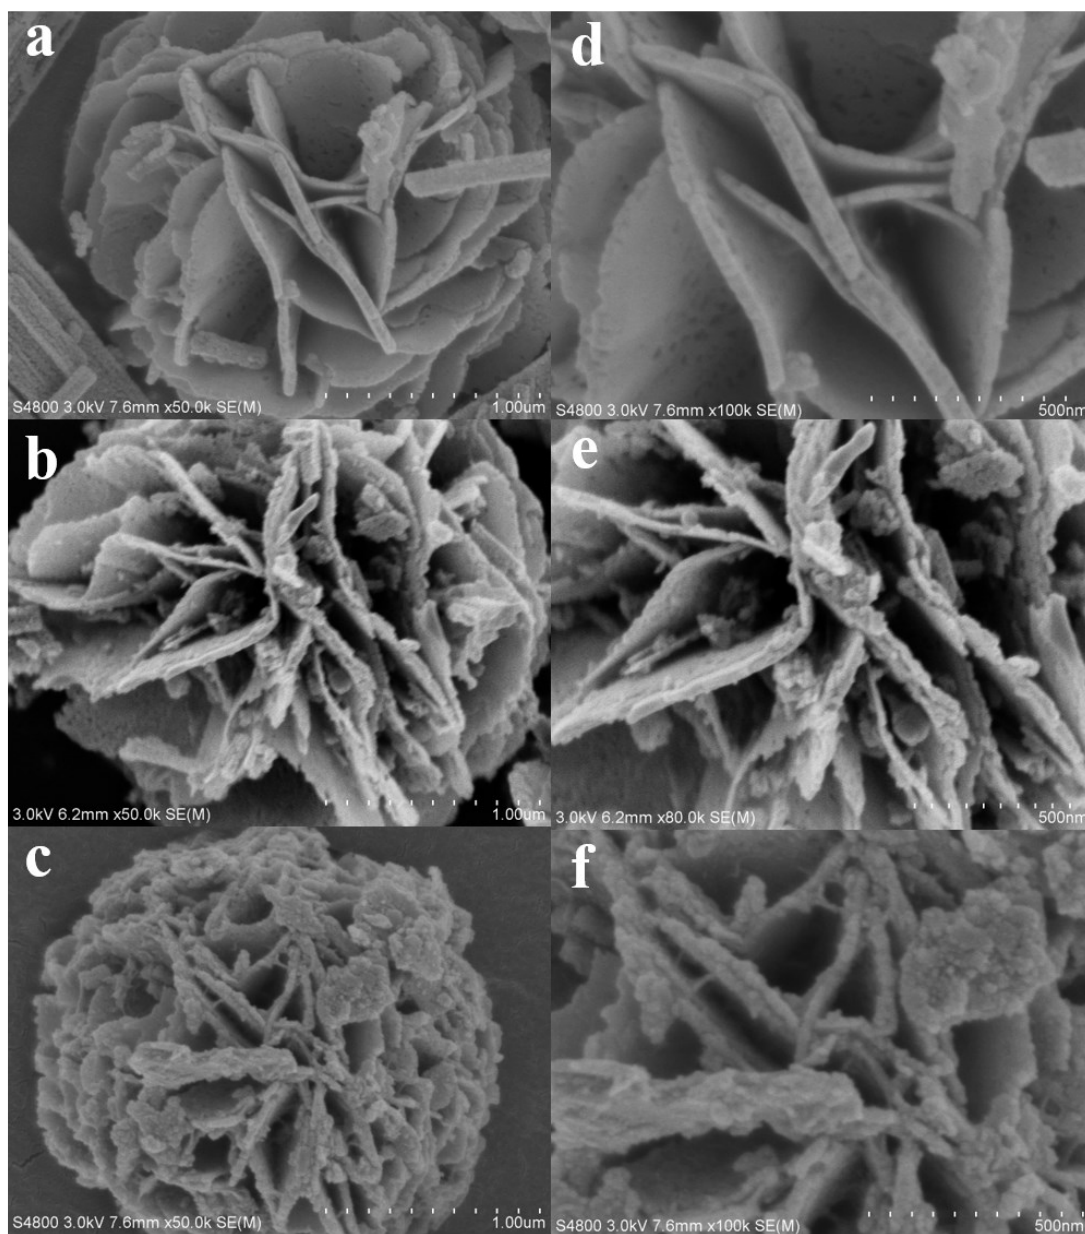

**Figure S3.** SEM images of the samples. **a, d.** NCO-C. **b, e.** NCO-CP-Ar. **c, f.** NCO-CP-AC.



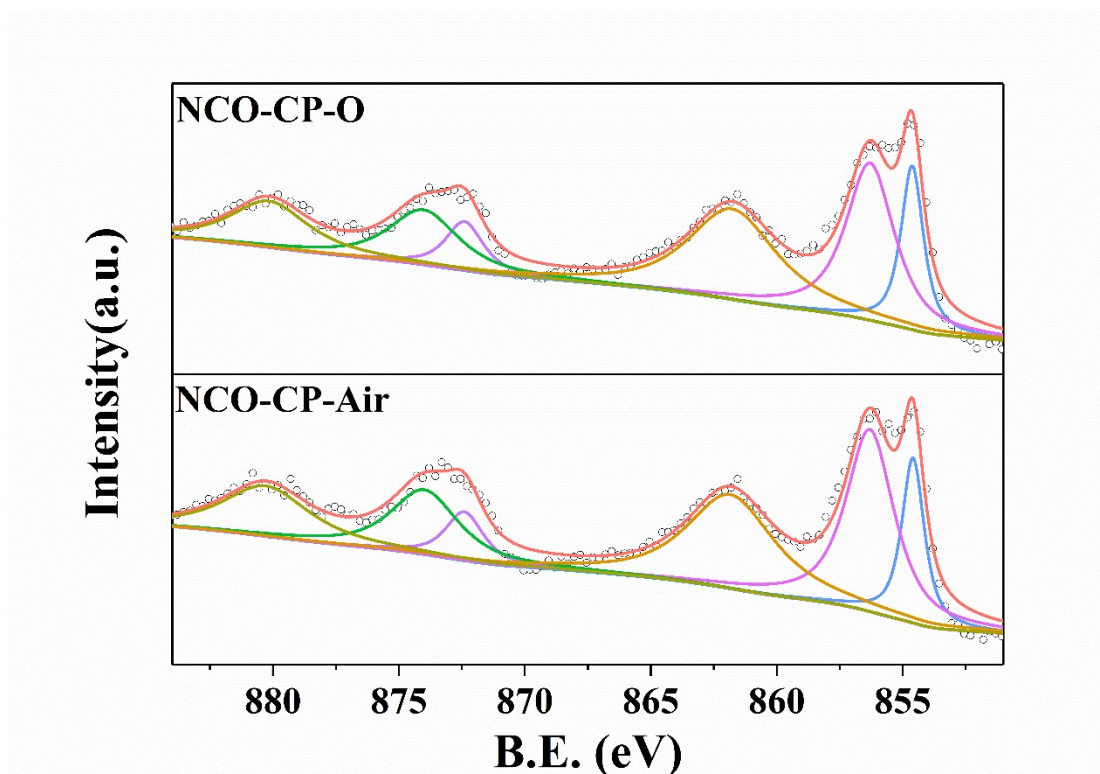

Figure S4. Deconvoluted XPS of Ni 2p of NCO-CP-O and NCO-CP-Air.

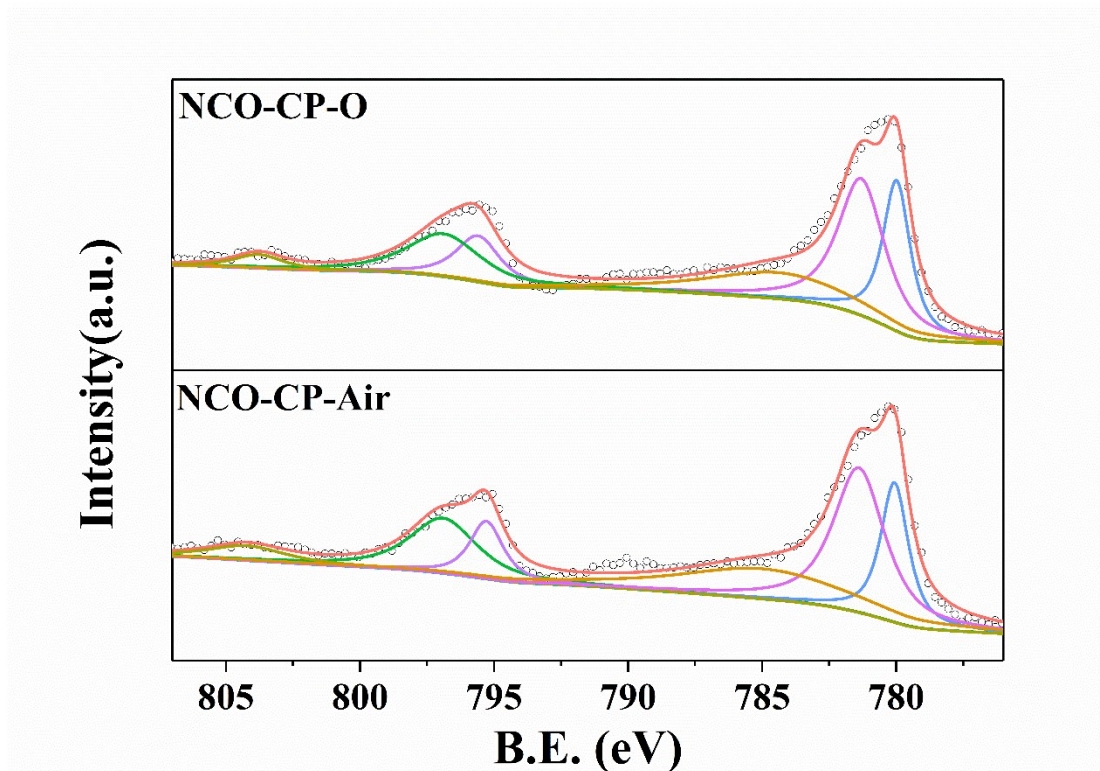

Figure S5. Deconvoluted XPS of Co 2p of NCO-CP-O and NCO-CP-Air.

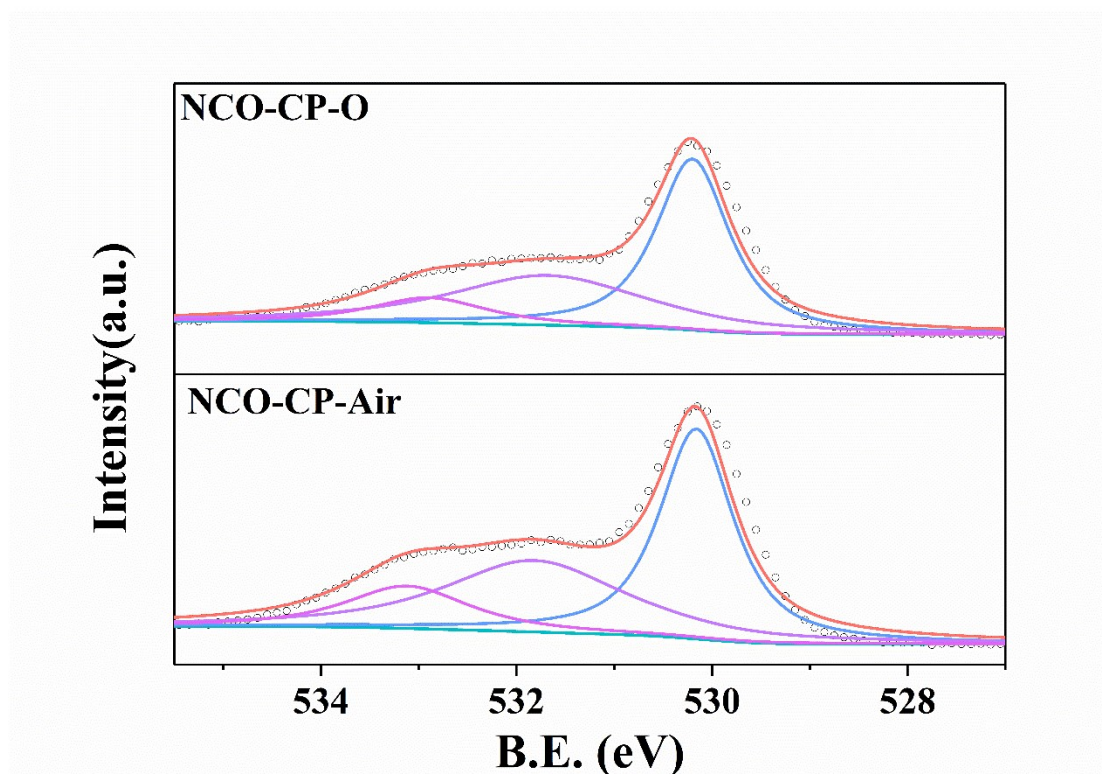

**Figure S6.** Deconvoluted XPS of O 1s of NCO-CP-O and NCO-CP-Air.

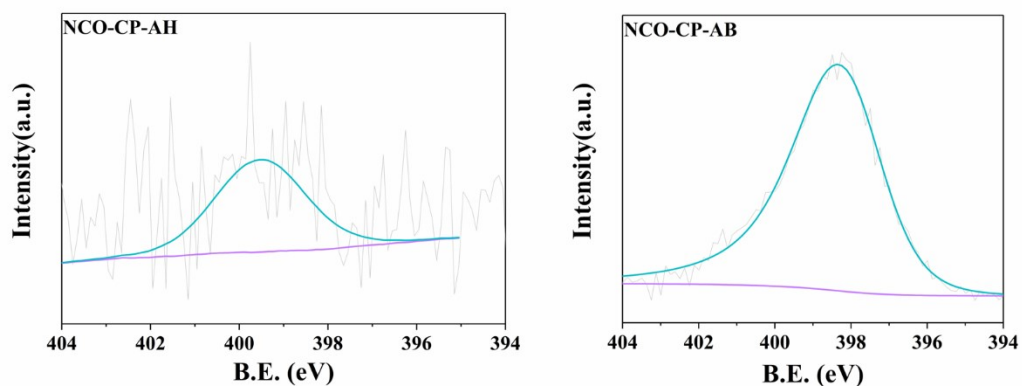

**Figure S7.** XPS of N 1s of NCO-CP-AH and NCO-CP-AB.

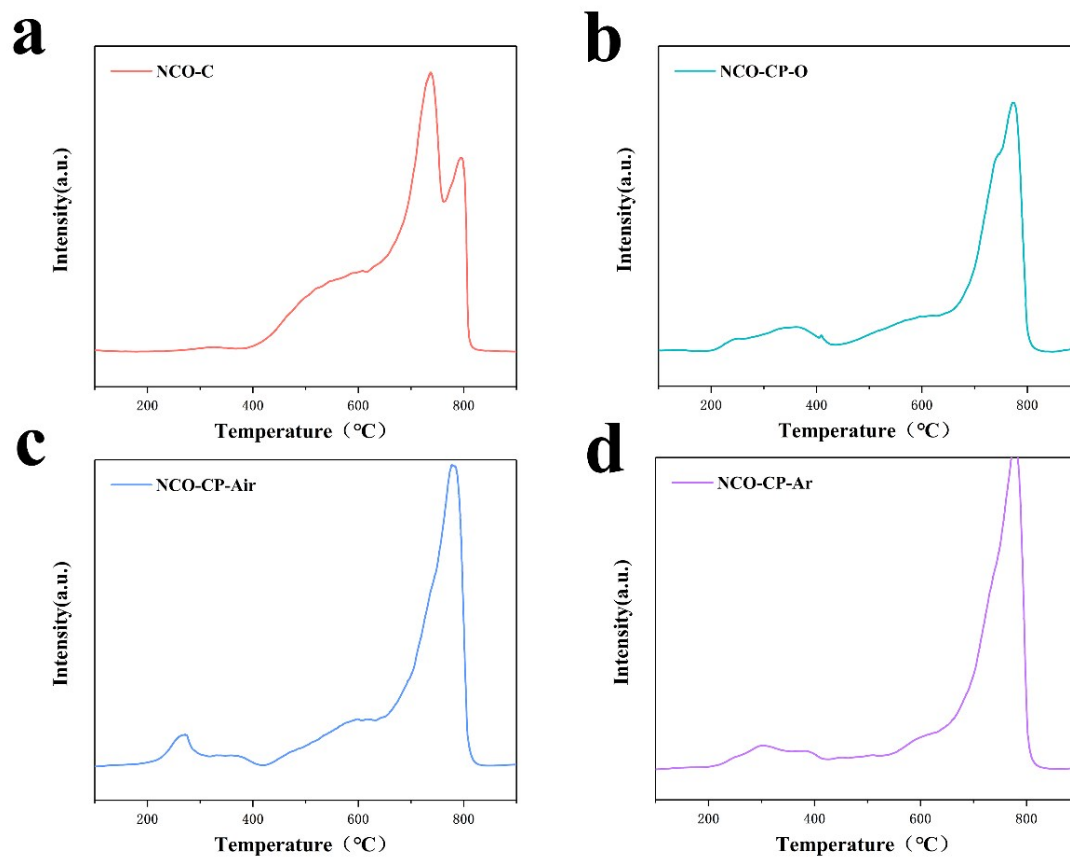

**Figure S8.** O<sub>2</sub>-TPD profiles of the NCO-C, NCO-CP-O, NCO-CP-Air and NCO-CP-Ar samples.



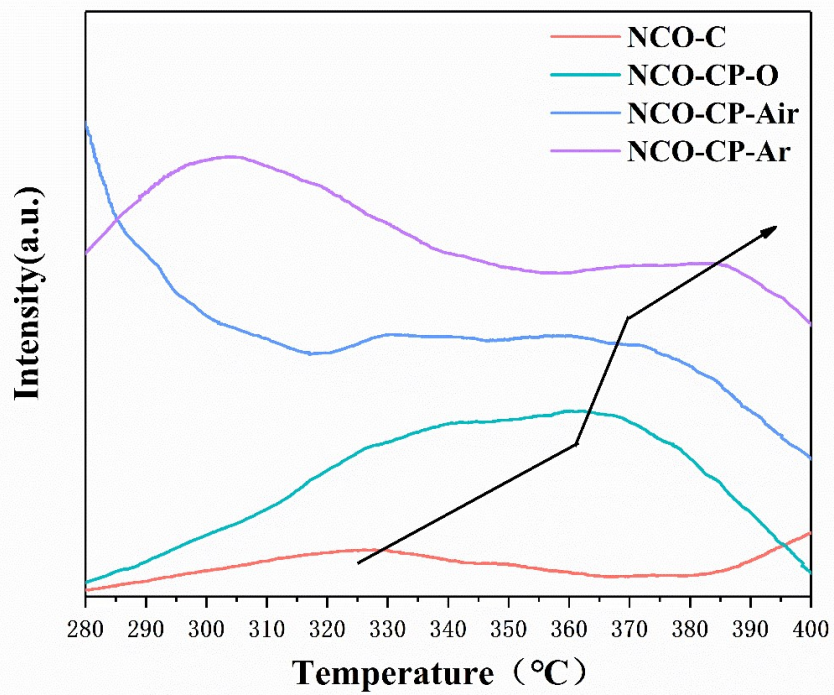

Fi

Figure S9. larger scale of O<sub>2</sub>-TPD in 200 to 400 °C

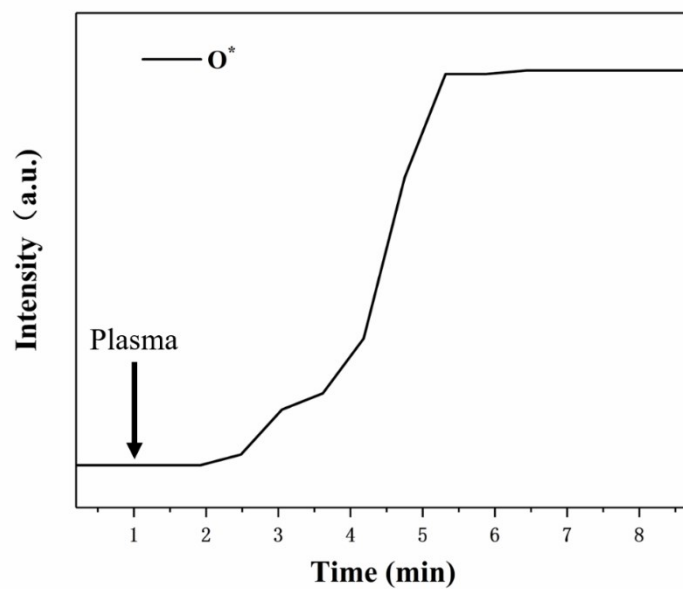

Figure S10. Mass spectrum during cold plasma treatment process of NiCo<sub>2</sub>O<sub>4</sub>.

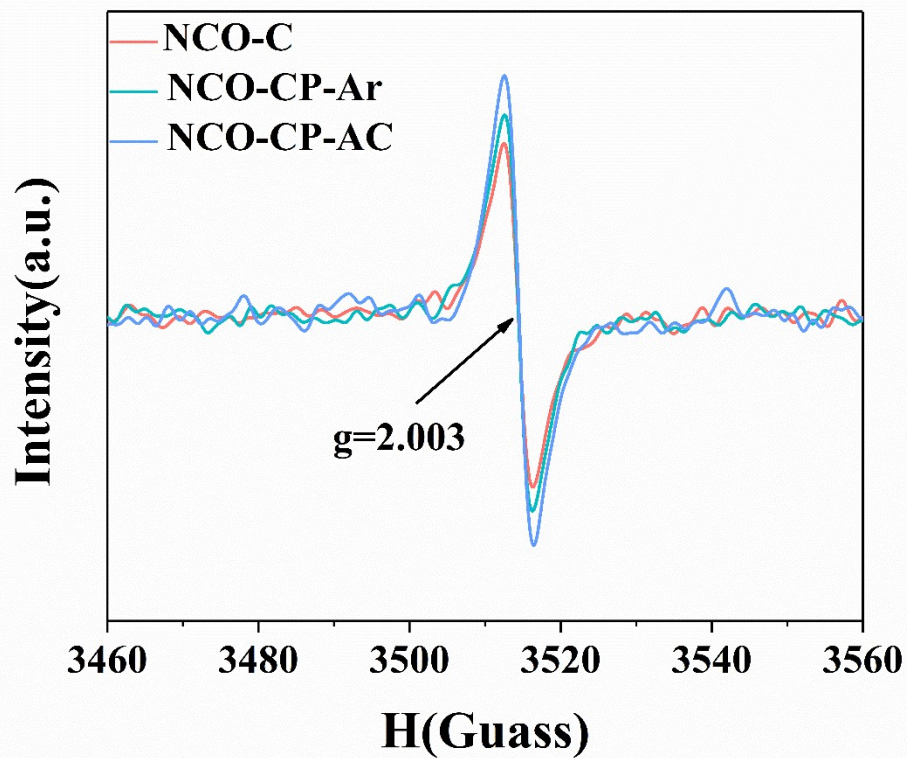

**Figure S11.** Electron paramagnetic resonance (EPR) spectra of NCO-C, NCO-CP-Ar and NCO-CP-AC

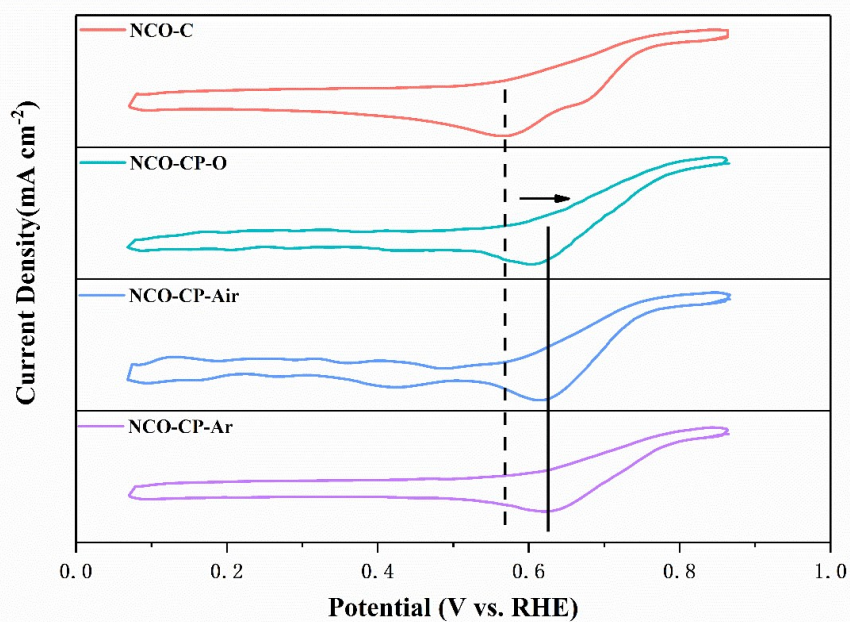

**Figure S12.** CV curves of NCO-C, NCO-CP-O, NCO-CP-Air and NCO-CP-Ar for ORR in O<sub>2</sub> saturated 0.1M KOH electrolyte with a scan rate of 10 mV s<sup>-1</sup>.

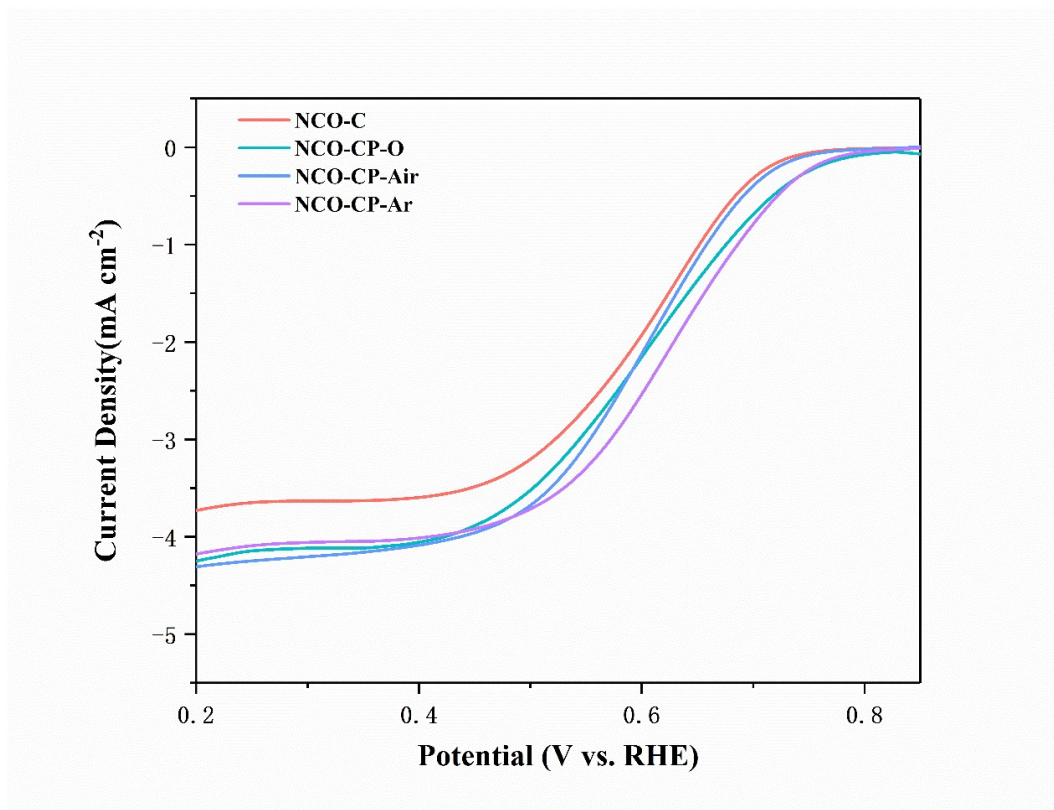

**Figure S13.** Linear sweep voltammetric curves of NCO-C, NCO-CP-O, NCO-CP-Air and NCO-CP-Ar for ORR at a rotating speed of 1600 rpm.

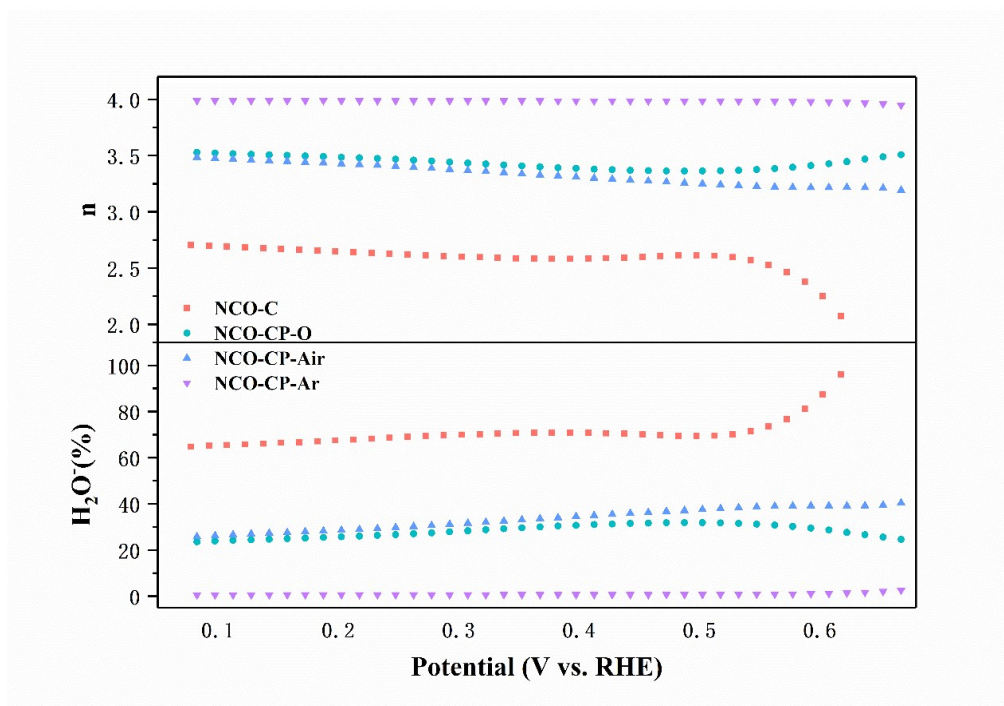

**Figure S14.** The electron transfer number n and peroxide (HO<sub>2</sub><sup>-</sup>) yields of NCO-C,



NCO-CP-O, NCO-CP-Air and NCO-CP-Ar with respect to the total oxygen reduction products.

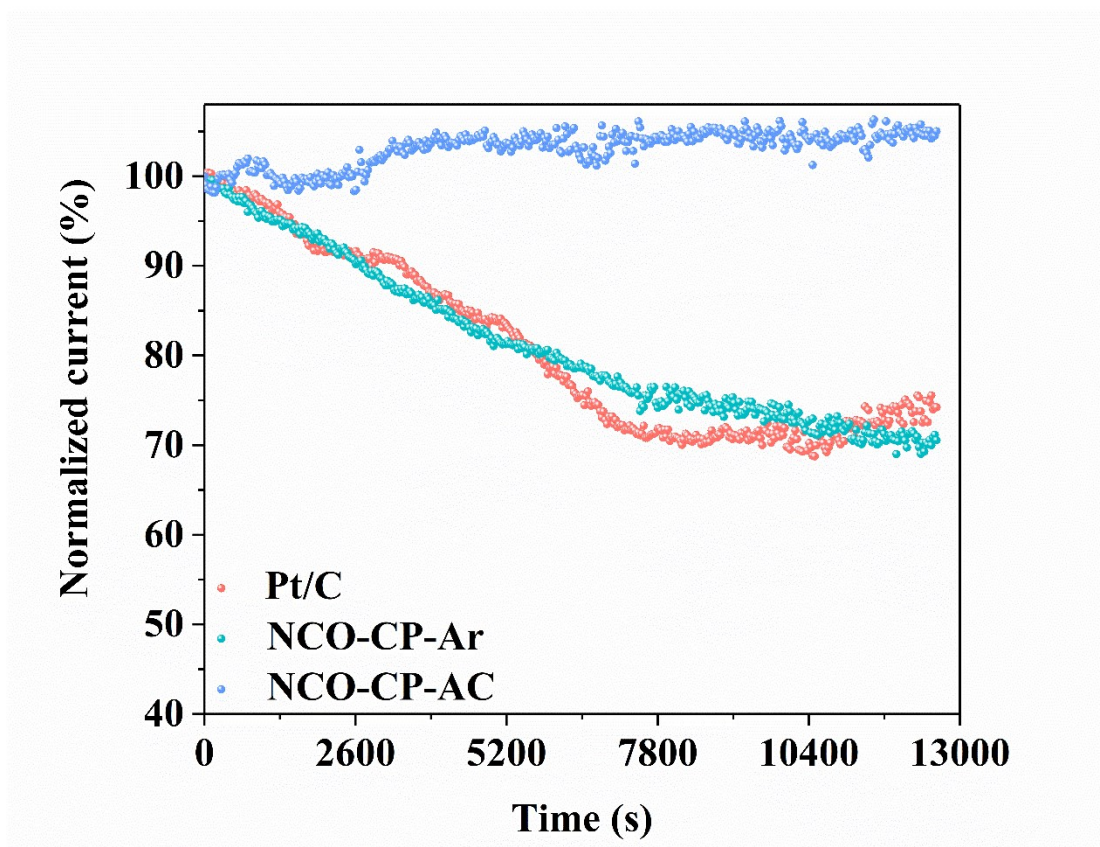

**Figure S15.** Stability of Pt/C, NCO-CP-Ar and NCO-CP-AC at 0.27 V vs RHE.

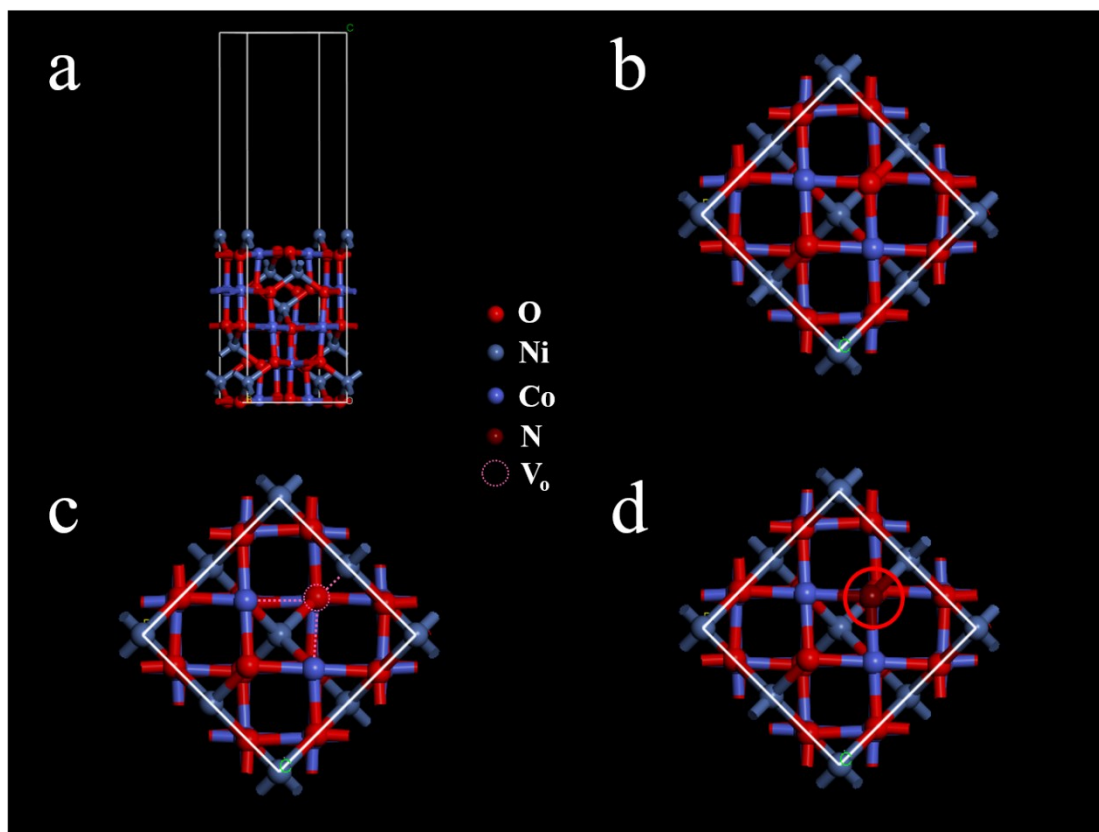

**Figure S16.** a, b Top and side views of NCO-C model. c, d Side views of NCO-CP-Ar and NCO-CP-AC model.

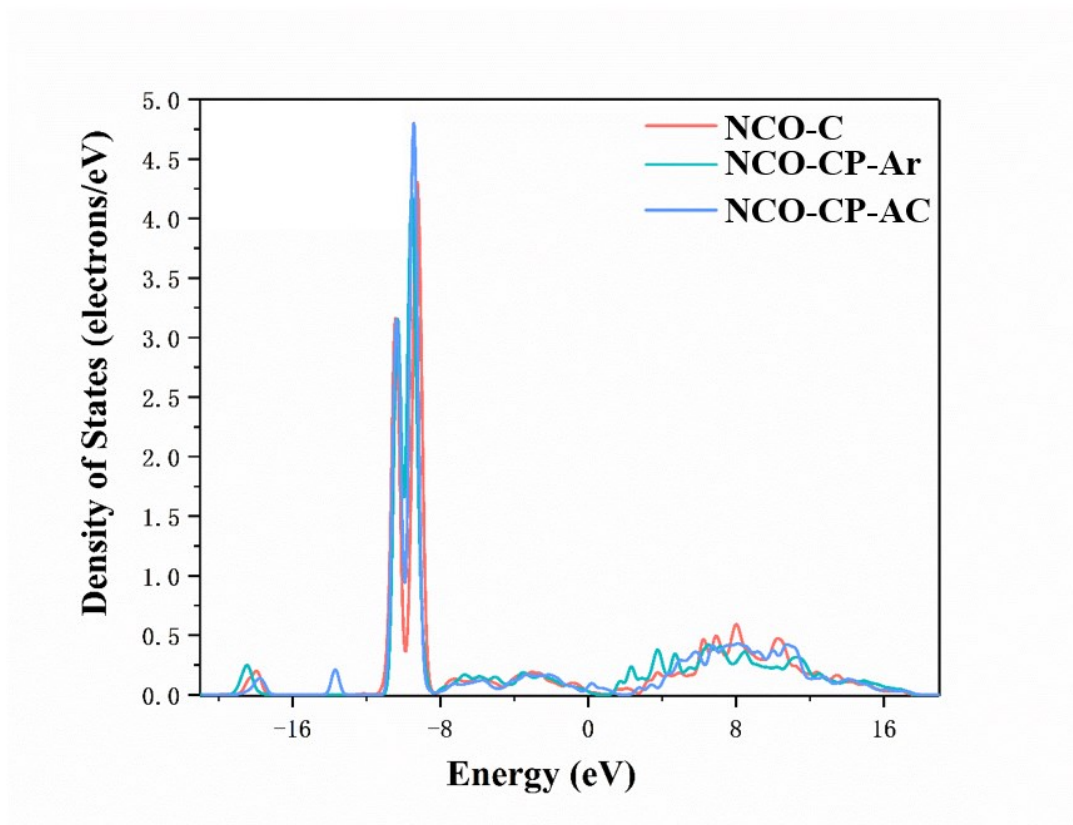

**Figure S17.** Computed density of states of Ni for NCO-C, NCO-CP-Ar and NCO-CP-AC.



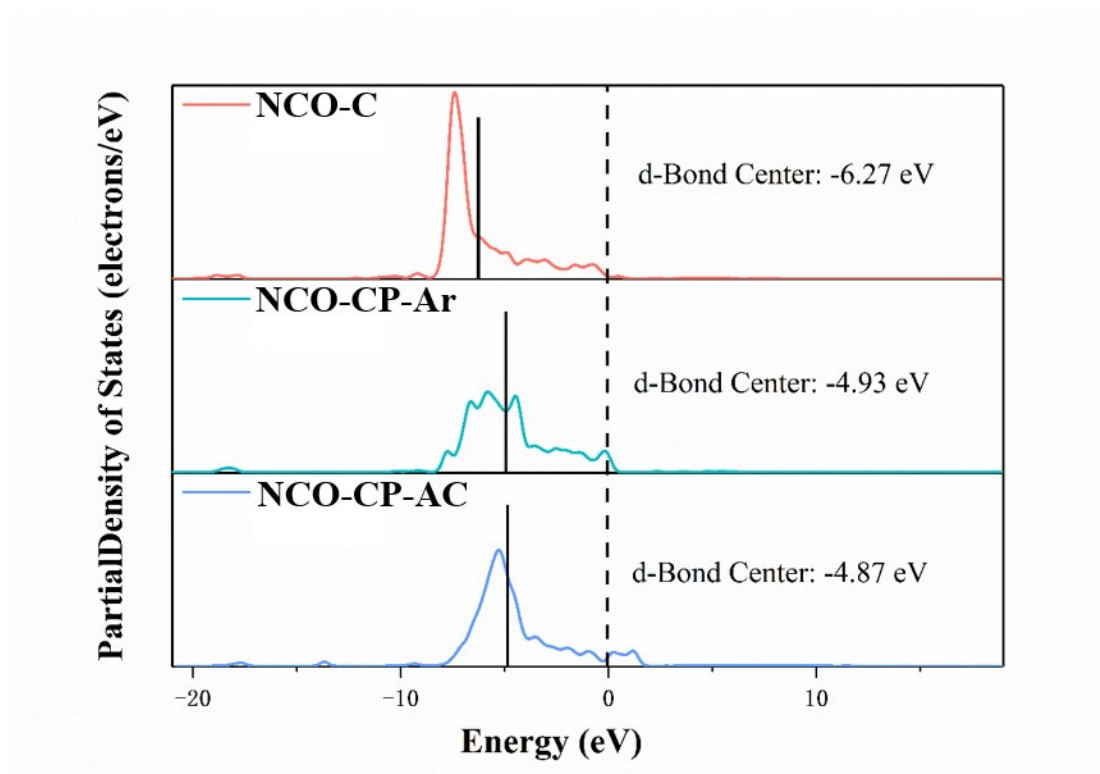

**Figure S18.** Computed d-bond center for NCO-C, NCO-CP-Ar and NCO-CP-AC, respectively.

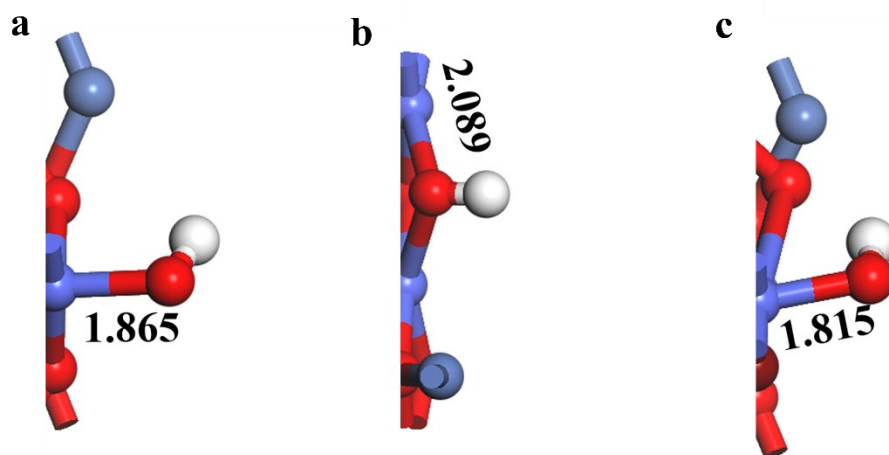

**Figure S19.** The structural optimization processes of  $\text{OH}^-$  adsorbed on NCO-C, NCO-CP-Ar and NCO-CP-AC, respectively.
